# Supplementary material
Source: PubMed Central journal article supplement (PMC3619340)
Supplement: 1222458110_pnas.201222458SI.pdf [file 1222458110_pnas.201222458SI.pdf]

# Supporting Information

Foit et al. 10.1073/pnas.1222458110

CLUSTAL 2.1 multiple sequence alignment

```
gi_226939674_ref_YP_002794747_      -----MKTRSATVLAALALALGAGMAHAAD-----AAGK 29
gi_3660012|pdb|1BG8|A                -----AD-----AQKA 6
gi_324115328|gb|EGC09292.1|          -----MKKAISILLGGLLLMPVISNAEE-----TQKA 27
gi_365848927|ref|ZP_09389398.1|      -----MKKVTGLILGSLLLIPALS-----QA 21
gi_339763595|gb|AEJ99815.1|          -----MKVKSIVFGAIGALFLTS-----AAHA 22
gi_317494458|ref|ZP_07952872.1|      -----MNKKTLLISMVCLMGFSA-----IGHA 22
gi_183600608|ref|ZP_02962101.1|      -----MKKYFIVGIIAASLTSLSAM-----AEDK 24
gi_268591600|ref|ZP_06125821.1|      -----MKKILFASIIATSLMTTSFAF-----AAT- 23
gi_354594842|ref|ZP_09012879.1|      -----MAAAN-----AAEK 9
gi_187479095|ref|YP_787120.1|        -----MKKAMLAVTMLG-LASLAG-----AAH 21
gi_293604620|ref|ZP_06687022.1|      MLIPHFGIEIMKKRIFTLALVA-MAAVSG-----AAN 31
gi_187479269|ref|YP_787294.1|        -----MKKIIISLSIAAATLSFSG-----TAL 22
gi_323139382|ref|ZP_08074433.1|      -----MKLRYFAFVACLLAAQGA-----VAD 21
gi_323139170|ref|ZP_08074426.1|      -----MKTLYLAAVAVAVFATTA-----QAD 21
gi_226939974|ref|YP_002795047.       -----MQRSLALSGLALALFATMS-----VAG 22
gi_225628791|ref|ZP_03786825.1|      -----MIKALFNKNTALA AAVAILALSGGMAAES-----AKTHKT 34
gi_188584311|ref|YP_001927756.       -----MRTGFLKTHLLPAIAVVLVSAAGVQAETSG--GKSADKHQE 38
gi_357939260|gb|AET92817.1|          -----MKFSKS-----IAAAMCVLVIGASG-----VARA 24
gi_238023991|ref|YP_002908223.       -----MKKITMWMYMAAALAGIATANVA-----FAQT 26
gi_326314934|ref|YP_004232606.       ----MRVLARLSVLTLSLAAAAAMAQTSPSPAAPSAAATPAAATAPAPA 46

gi_226939674_ref_YP_002794747_      TASPKGYKWTCDQDFLDLDESFKPKVYVWAEFGNNKGKPDAAAM-VDVQGV 78
gi_3660012|pdb|1BG8|A                ADNKKPVNSWTCEDFLAVDESFPQTAVGFAEALNNKDKPEDAV-LDVQGI 55
gi_324115328|gb|EGC09292.1|          ADNQKPVNSWTCEDFLALDATFPQTAVGFAEALNNKDKPEDAV-MDVQGI 76
gi_365848927|ref|ZP_09389398.1|      AETQKPVNNWTCEDFLALDSSFQPTAVGFAEALNSKDKPEDAI-MDVKGI 70
gi_339763595|gb|AEJ99815.1|          ADHKKPVNSWTCEDFLAVNEDFPQTAVGFAEALNSKDKPEDAV-LNVSGI 71
gi_317494458|ref|ZP_07952872.1|      AENKKPVNSWTCEDFLALDESFPKPTAIGFAEALNNKDKPEDAV-LDVGT 71
gi_183600608|ref|ZP_02962101.1|      KNDTKPLAEWTCCEEFLAIDDNFYPTAVGFGELLTKDKKPEDAV-LDVGI 73
gi_268591600|ref|ZP_06125821.1|      --DAKPVSWTCEDFLAIDDAFYPTAIGAAEII TQKGVDEPT-LDISGI 70
gi_354594842|ref|ZP_09012879.1|      TQAQKPINQWTCQDFLMLDENFPQTAVGFAEGITKKDKVVDPT-LDVQGI 58
gi_187479095|ref|YP_787120.1|        ADTKKPVQLWLCSDYLEVNETYRPTALGFAEAVNKKGVDEAV-VDEGI 70
gi_293604620|ref|ZP_06687022.1|      ADSKKPVSLWLCSDYLEVNETYRPTALGFAEAVNKKGVDEAV-LDVEGI 80
gi_187479269|ref|YP_787294.1|        ADAKKPMPLWQCSYDLQNLSEYRPAVALGFAEAVNKKGVDEAV-LDVEGI 71
gi_323139382|ref|ZP_08074433.1|      T--KKPVSKWTCEEFLAVESDFQPKVIYWSSAQGGKPTGFV-DIEG-A 59
gi_323139170|ref|ZP_08074426.1|      T--KKPVSKWTCEEFLAVEDQFQPKVIYWSSAQGGKPTGFV-DIEG-A 67
gi_226939974|ref|YP_002795047.       TPKKPVSWTCCEEFLTLDDQFKPNAVYFSEGLNKKHQPVDV-MDETGA 71
gi_225628791|ref|ZP_03786825.1|      DMAKKVSELTCEDFNGLSEESFPKPTVGVVGVGFKKGVDEAV-IDVDGI 83
gi_188584311|ref|YP_001927756.       KLASKPLEKVTCEEFGFEDTFKPKVVAWAAGYKQGGKPEDAVIDIAGV 88
gi_357939260|gb|AET92817.1|          AEQKITPAKMTCADFVQVDDAYKPAVYVWAGVDKLGVTGTET-TVVDTM 73
gi_238023991|ref|YP_002908223.       AAKTISPAMVCADFETLDDAYKPAVYVWATGVDKLGVTRETQ-ITIDTA 75
gi_326314934|ref|YP_004232606.       AKARKPLVKTTCSDYVGMDETIPKPFIIYAVGHTQGGKKEAVF--EEDAI 94
                                     *  ::  .:  *  :

gi_226939674_ref_YP_002794747_      EKIIIPVVVDQCKLKPTTEKLKMKMSAKMTAGH----- 110
gi_3660012|pdb|1BG8|A                ATVTIPAIVQACTQDKQANFKDKVKGGEWDKIKKDM----- 89
gi_324115328|gb|EGC09292.1|          ETVTIPAIVQACTQDKKASFKKAQGEWAKIKKDL----- 110
gi_365848927|ref|ZP_09389398.1|      ETVTIPAIVQACTENQKASFKDKVSEWDFKQHI----- 104
gi_339763595|gb|AEJ99815.1|          EKVTPITIVQACQDKDKMSFKDKVRAENDNLKKEIY----- 106
gi_317494458|ref|ZP_07952872.1|      EKVIPLVIEACKQNPKESEFAQKVKSEWKKVKKDM----- 105
gi_183600608|ref|ZP_02962101.1|      QTLTPVVIDACKKDTKANFVEQVKNNAK----- 101
gi_268591600|ref|ZP_06125821.1|      ATSTPLIVEACEKAPKESFIQKVEAHLKKM----- 100
gi_354594842|ref|ZP_09012879.1|      AQVVPVLVQECKSPKDNFVNKVTNLTDK----- 89
gi_187479095|ref|YP_787120.1|        EKIKPSLLTYCKENPKIALRDALDN----VRK----- 98
gi_293604620|ref|ZP_06687022.1|      TKVKPEVLTYCKENPKIALRDALVQSWGKVKK----- 112
gi_187479269|ref|YP_787294.1|        AQITPTLVITYCQENPKVALTDALAQTKANAANTTSKTPPTSSTTAK 117
gi_323139382|ref|ZP_08074433.1|      -----PS---WT----- 63
gi_323139170|ref|ZP_08074426.1|      EKVVPMVIDDCKKAPQESYWSKLKAAWKKVEADAKALEKKM----- 108
gi_226939974|ref|YP_002795047.       LKVTPMVVTECQDKRKAWSFKLKTWQHIEQKM----- 105
gi_225628791|ref|ZP_03786825.1|      ETVTIP-CHHRLQAGAESIVLEKG----- 106
gi_188584311|ref|YP_001927756.       EKVTPLIAEECKRKAASLWSKIDGELKKVF----- 119
gi_357939260|gb|AET92817.1|          QPVAATVAQECQKDPQTKFMSKVRSMIKSKQIALFDHH----- 111
gi_238023991|ref|YP_002908223.       HPVVAEQVTECKATPKVKIVDKIRMMAKAGKLSIYKRN----- 113
gi_326314934|ref|YP_004232606.       EKIKPELDQYCSVHLTKSAYAKVMASMASSEGTAAHGHSKAK---- 136
```

**Fig. S1.** ClustalW (1) sequence alignment of HdeA sequences. For *Escherichia coli* HdeA (Protein Data Bank ID code 1BG8), only the protein sequence reflecting the mature protein is shown. All other protein sequences contain their respective signal sequences.

1. Thompson JD, Higgins DG, Gibson TJ (1994) CLUSTAL W: Improving the sensitivity of progressive multiple sequence alignment through sequence weighting, position-specific gap penalties and weight matrix choice. *Nucleic Acids Res* 22(22):4673–4680.

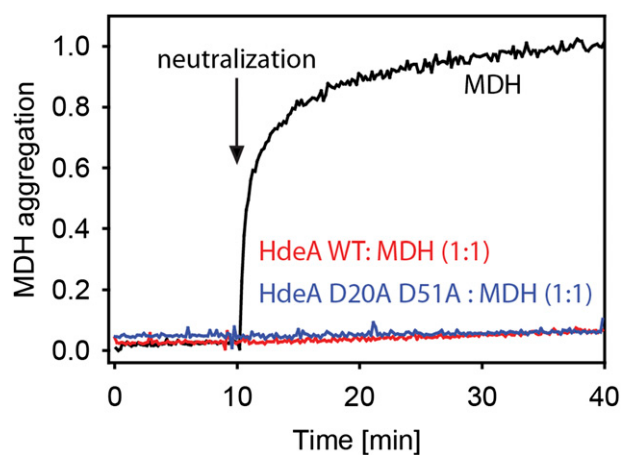

**Fig. S2.** Chaperone activity of WT HdeA and HdeA D20A D51A variant after neutralization. Guanidine denatured malate dehydrogenase (MDH) was diluted in aggregation buffer (pH 2.2) to a final concentration of 4  $\mu$ M and incubated for 30 min. MDH aggregation was induced by neutralization with 2 M  $K_2HPO_4$  and measured by monitoring light scattering at 350 nm in the presence or absence of various HdeA variants. Indicated is the extent of aggregation 30 min after neutralization, normalized to the aggregation of MDH in the absence of HdeA.

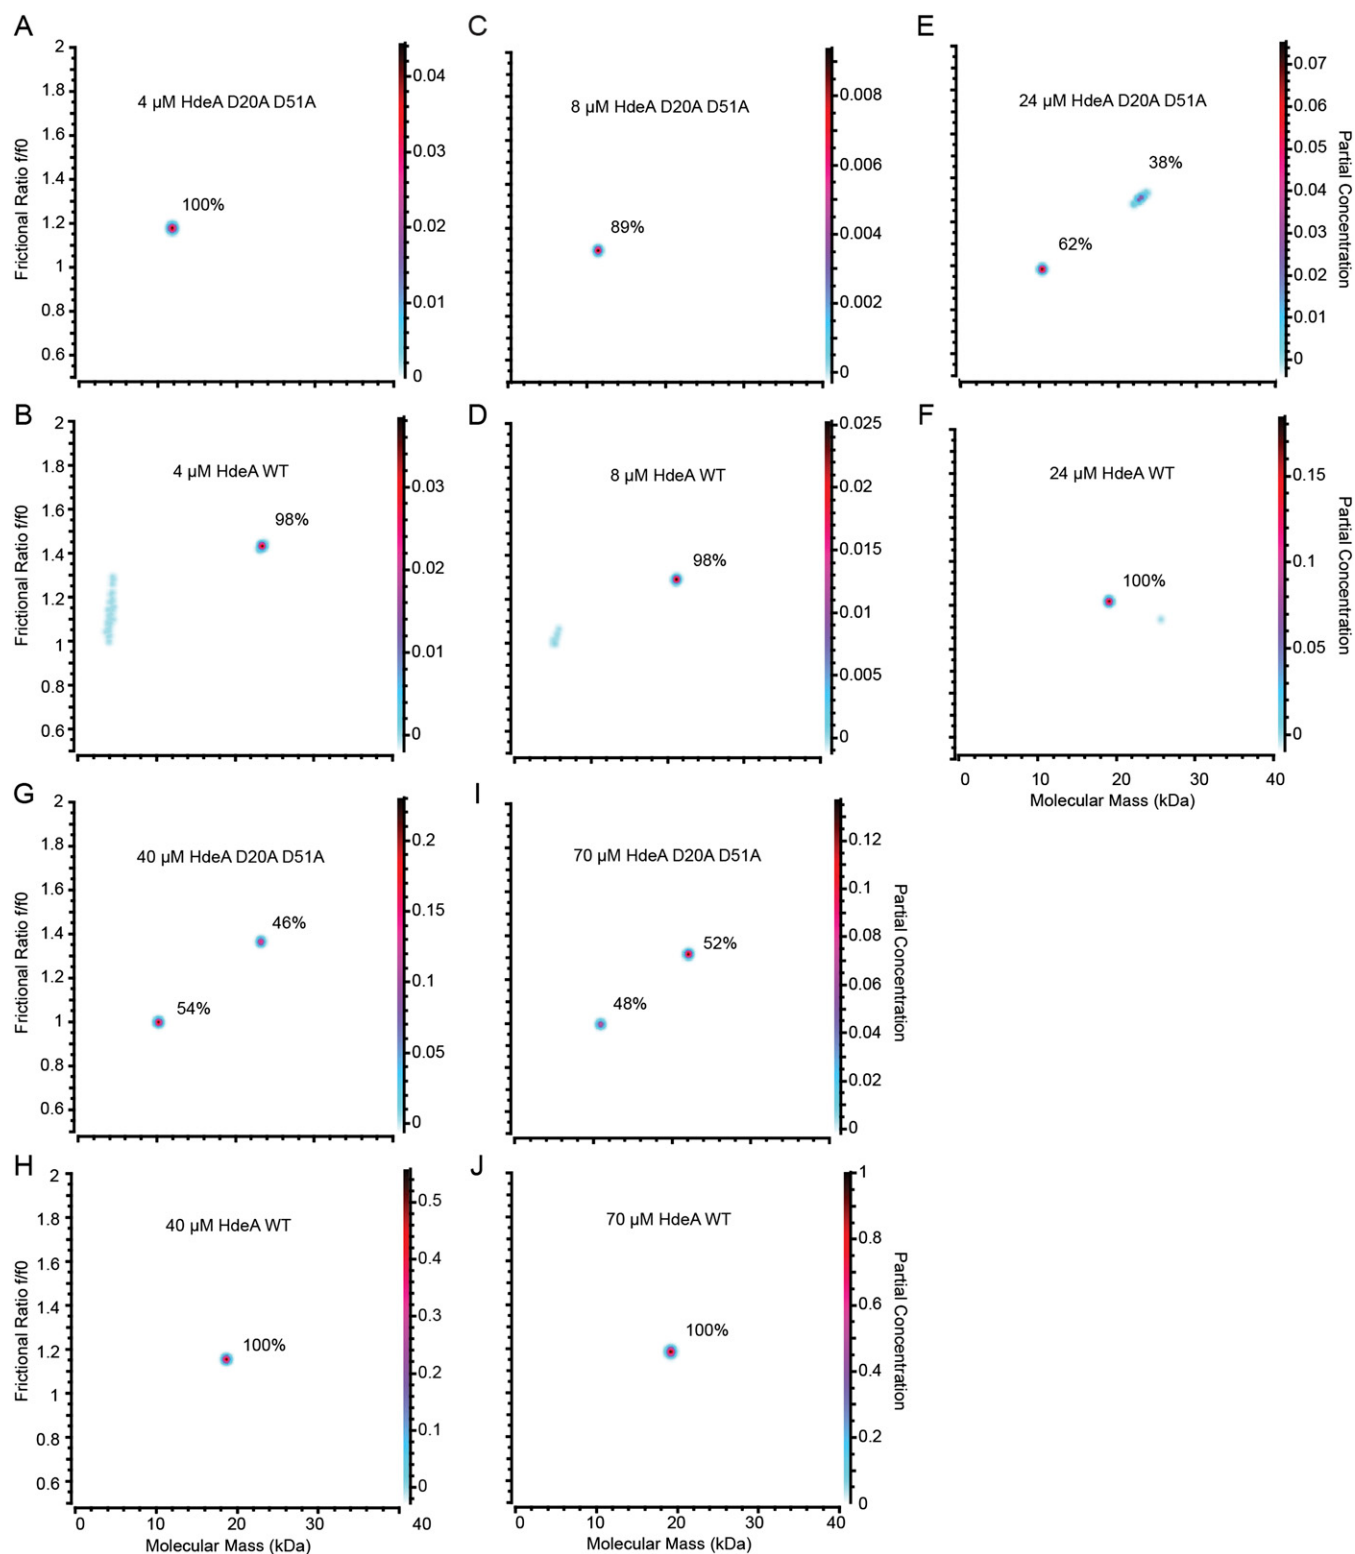

**Fig. S3.** Analytical ultracentrifugation sedimentation velocity analysis of WT HdeA (*B*, *D*, *F*, *H*, and *J*) and HdeA D20A D51A (*A*, *C*, *E*, *G*, and *I*) at pH 5. The molecular mass of WT HdeA is 9.7 kDa (monomer) and 19.5 kDa (dimer). Fractions of the monomeric and dimeric species are indicated. The  $K_d$  of dimerization for HdeA D20A D51A at pH 5 is in the range of 30  $\mu$ M. (*C*) In addition to a species of about 10 kDa, a species of high molecular mass (about 90 kDa) was detected (11%), but no species corresponding to the HdeA dimer was detected.

**Table S1. Predicted molecular mass and frictional ratios for putative dimeric species of different HdeA variants at different concentrations**

| Protein concentration, $\mu\text{M}$ | HdeA WT                      |                           | HdeA D20A D51A               |                           |
|--------------------------------------|------------------------------|---------------------------|------------------------------|---------------------------|
|                                      | Apparent molecular mass, kDa | Frictional ratio, $f/f_0$ | Apparent molecular mass, kDa | Frictional ratio, $f/f_0$ |
| 4                                    | 23.33                        | 1.43                      | n.a.                         | n.a.                      |
| 8                                    | 21.16                        | 1.29                      | n.a.                         | n.a.                      |
| 17                                   | 19.50                        | 1.20                      | 21.80                        | 1.29                      |
| 24                                   | 19.00                        | 1.18                      | 22.91                        | 1.35                      |
| 40                                   | 18.61                        | 1.16                      | 23.20                        | 1.37                      |
| 70                                   | 19.10                        | 1.19                      | 22.08                        | 1.32                      |

The apparent molecular mass and the frictional ratios at pH 5 for HdeA WT and HdeA D20A D51A, respectively, were determined using analytical ultracentrifugation. Due to low signal extensity, the fractional ratio and molecular mass are approximate for protein concentrations of 4 and 8  $\mu\text{M}$ . n.a., not applicable.
